# Supplementary material for: Association of Nutrition in Early Childhood with Body Composition and Leptin in Later Childhood and Early Adulthood
Source: MDPI journal article supplement (doi:10.3390/nu13093264), 2021-09-18
Supplement: s1 [file s1]

## Supplementary tables

**S1:** Characteristics and demographics of CiF children who had data available at 9 and 17 years compared with those who did not

### Replication analyses

**S2:** Multiple linear regression models for energy and energy-adjusted macronutrient intakes, using diet collected at 8 months of age to predict body composition and serum leptin concentration at the age of 9 years and body composition at 17 years of age in children enrolled in ALSPAC-CiF (**replication analysis** of Rolland Cachera et al, 1995, 2012 [16, 17])

**S3:** Multiple linear regression models for energy and energy-adjusted macronutrient intakes, using diet collected at 18 months of age to predict body composition and serum leptin concentration at the age of 9 years and body composition at 17 years of age in children enrolled in ALSPAC-CiF (**replication analysis** of Rolland Cachera et al, 1995, 2012 [16, 17])

### Sex-specific extended analyses for diet at 8 months of age

**S4:** Multiple linear regression models for energy and energy-adjusted macronutrient intakes of **boys**, using diet collected at 8 months of age to predict body composition and serum leptin concentration at the age of 9 years and body composition at 17 years of age in children enrolled in ALSPAC-CiF

**S5:** Multiple linear regression models for energy and energy-adjusted macronutrient intakes of **boys (plausible reporters only)**, using diet collected at 8 months of age to predict body composition and serum leptin concentration at the age of 9 years and body composition at 17 years of age in children enrolled in ALSPAC-CiF

**S6:** Multiple linear regression models for energy and energy-adjusted macronutrient intakes of **girls**, using diet collected at 8 months of age to predict body composition and serum leptin concentration at the age of 9 years and body composition at 17 years of age in children enrolled in ALSPAC-CiF

**S7:** Multiple linear regression models for energy and energy-adjusted macronutrient intakes of **girls (plausible reporters only)**, using diet collected at 8 months of age to predict body composition and serum leptin concentration at the age of 9 years and body composition at 17 years of age in children enrolled in ALSPAC-CiF

### Goodness of fit

**S8:** Goodness of fit for multiple linear regression models for energy and energy-adjusted macronutrient intakes of **boys**, using diet collected at 18 months of age to predict body composition and serum leptin concentration at 9 years of age and body composition at 17 years of age in children enrolled in ALSPAC-CiF (Table 2)

**S9:** Goodness of fit for multiple linear regression models for energy and energy-adjusted macronutrient intakes of **girls** using diet collected at 18 months of age to predict body composition and serum leptin concentration at 9 years of age and body composition at 17 years of age in children enrolled in ALSPAC-CiF (Table 4)

**S1:** Characteristics and demographics of CIF children who had data available at 9 and 17 years compared with those who did not

|                                               | Data available at 9 and 17 years | Data not available at 9 and 17 years | P value (Chi square or t-test) |
|-----------------------------------------------|----------------------------------|--------------------------------------|--------------------------------|
| Weight at birth (g)                           | 3421±522 (n=561)                 | 3441±535 (n=856)                     | 0.498                          |
| Length at birth (cm)                          | 50.5±2.2 (n=490)                 | 50.6±2.1 (n=710)                     | 0.401                          |
| BMI at 8 months (kg/m <sup>2</sup> )          | 17.9±1 (n=537)                   | 17.9±1.5 (n=771)                     | 0.886                          |
| BMI at 18 months (kg/m <sup>2</sup> )         | 17.1 (n=507)                     | 17.1 (n=649)                         | 0.622                          |
| Energy intake at 8 months (kJ)                | 3368±713 (n=505)                 | 3458±739 (n=672)                     | 0.037                          |
| % Energy as fat                               | 35.4±5.1 (n=505)                 | 35.4±5.1 (n=672)                     | 0.950                          |
| % Energy protein                              | 13.5±2.6 (n=505)                 | 13.8±2.8 (n=672)                     | 0.112                          |
| % Energy carbohydrate                         | 50.9±5.6 (n=505)                 | 50.7±5.7 (n=672)                     | 0.592                          |
| Energy intake 18 months (kJ)                  | 4516±894 (n=470)                 | 4702±965 (n=555)                     | <0.001                         |
| % Energy fat                                  | 37.1±4.8 (n=470)                 | 37.6±4.7 (n=555)                     | 0.092                          |
| % Energy protein                              | 15.4±2.3 (n=470)                 | 15.2±2.2 (n=555)                     | 0.157                          |
| % Energy carbohydrate                         | 47.6±5.7 (n=470)                 | 47.3±5.5 (n=555)                     | 0.394                          |
| Sex                                           |                                  |                                      |                                |
| Male (%)                                      | 47.0 (n=264)                     | 58.5 (n=507)                         | <0.0001                        |
| Female (%)                                    | 53.0 (n=298)                     | 41.5 (n=360)                         |                                |
| Breastfeeding                                 |                                  |                                      |                                |
| Never breastfed (%)                           | 14.9 (n=81)                      | 28.4 (n=220)                         | <0.0001                        |
| Breastfed (%)                                 | 85.1 (n=464)                     | 71.6 (n=556)                         |                                |
| Gestation (weeks)                             | 39.4±1.8 (n=562)                 | 39.5±1.6 (n=867)                     | 0.426                          |
| Mothers age at delivery (years)               | 29.9±4.5 (n=562)                 | 28.2±4.7 (n=867)                     | <0.0001                        |
| Maternal education                            |                                  |                                      |                                |
| CSE, O-level or vocational qualifications (%) | 50.6 (n=282)                     | 66.7 (n=538)                         | <0.0001                        |
| A level or degree (%)                         | 49.4 (n=275)                     | 33.3 (n=268)                         |                                |
| Maternal BMI (kg/m <sup>2</sup> )             | 23.1±3.8 (n=527)                 | 23.4±4.2 (n=743)                     | 0.216                          |

Values are mean±SD or % (n).

**S2:** Multiple linear regression models for energy and energy-adjusted macronutrient intakes, using diet collected at 8 months of age to predict body composition and serum leptin concentration at the age of 9 years and body composition at 17 years of age in children enrolled in ALSPAC-CiF (replication analysis of Rolland Cachera et al, 1995, 2012 [16, 17])

| Models                               |                                 | Energy (0.42 MJ) |         | Protein (%E) <sup>a</sup> |         | Carbohydrate (%E) <sup>a</sup> |         | Fat (%E)            |         |                    |         |                    |         |
|--------------------------------------|---------------------------------|------------------|---------|---------------------------|---------|--------------------------------|---------|---------------------|---------|--------------------|---------|--------------------|---------|
|                                      |                                 |                  |         |                           |         |                                |         | Total <sup>a</sup>  |         | SFA <sup>a</sup>   |         | MUFA <sup>a</sup>  |         |
|                                      |                                 | B (95% CI)       | P-value | B (95% CI)                | P-value | B (95% CI)                     | P-value | B (95% CI)          | P-value | B (95% CI)         | P-value | B (95% CI)         | P-value |
| 9 years<br>BMI (kg/m <sup>2</sup> )  | Unadjusted <sup>b</sup> (n=806) | 0.1 (-0.02, 0.2) | 0.094   | 0.05 (-0.03, 0.13)        | 0.202   | -0.01 (-0.05, 0.03)            | 0.533   | 0.0 (-0.04, 0.04)   | 0.948   | 0.05 (-0.01, 0.1)  | 0.111   | -0.05 (-0.1, 0.05) | 0.321   |
|                                      | Adjusted <sup>c</sup> (n=644)   | 0.1 (0.0, 0.3)   | 0.044   | 0.04 (-0.03, 0.12)        | 0.271   | -0.01 (-0.05, 0.03)            | 0.488   | 0.0 (-0.04, 0.04)   | 0.948   | 0.02 (-0.05, 0.08) | 0.623   | -0.00 (-0.1, 0.1)  | 0.957   |
|                                      | Unadjusted <sup>d</sup> (n=783) | 0.1 (-0.0, 0.1)  | 0.083   | 0.02 (-0.03, 0.06)        | 0.406   | -0.01 (-0.03, 0.02)            | 0.606   | 0.0 (-0.02, 0.02)   | 0.982   | 0.02 (-0.01, 0.06) | 0.197   | -0.02 (-0.1, 0.03) | 0.410   |
|                                      | Adjusted <sup>e</sup> (n=628)   | 0.1 (-0.0, 0.1)  | 0.138   | 0.02 (-0.03, 0.06)        | 0.499   | -0.01 (-0.03, 0.01)            | 0.340   | 0.01 (-0.02, 0.03)  | 0.621   | 0.02 (-0.02, 0.05) | 0.405   | 0.01 (-0.05, 0.1)  | 0.840   |
|                                      | Unadjusted <sup>d</sup> (n=783) | 0.0 (-0.2, 0.2)  | 0.865   | 0.1 (-0.05, 0.2)          | 0.235   | -0.03 (-0.1, 0.03)             | 0.306   | 0.02 (-0.04, 0.08)  | 0.557   | 0.1 (-0.01, 0.18)  | 0.067   | -0.03 (-0.2, 0.1)  | 0.660   |
|                                      | Adjusted <sup>e</sup> (n=628)   | 0.1 (-0.1, 0.3)  | 0.379   | 0.1 (-0.05, 0.2)          | 0.260   | -0.03 (-0.1, 0.03)             | 0.309   | 0.02 (-0.05, 0.08)  | 0.667   | 0.03 (-0.07, 0.1)  | 0.546   | 0.03 (-0.1, 0.2)   | 0.721   |
| 17 years<br>BMI (kg/m <sup>2</sup> ) | Unadjusted <sup>b</sup> (n=546) | 0.0 (-0.2, 0.3)  | 0.746   | 0.06 (-0.1, 0.2)          | 0.411   | 0.02 (-0.05, 0.08)             | 0.666   | -0.03 (-0.1, 0.04)  | 0.362   | 0.01 (-0.1, 0.1)   | 0.813   | -0.1 (-0.3, 0.04)  | 0.129   |
|                                      | Adjusted <sup>c</sup> (n= 439)  | 0.0 (-0.2, 0.3)  | 0.780   | 0.05 (-0.1, 0.2)          | 0.537   | -0.01 (-0.08, 0.06)            | 0.064   | -0.01 (-0.1, 0.07)  | 0.856   | -0.03 (-0.2, 0.1)  | 0.673   | -0.01 (-0.2, 0.2)  | 0.898   |
|                                      | Unadjusted <sup>d</sup> (n=514) | 0.1 (-0.1, 0.3)  | 0.497   | 0.07 (-0.1, 0.20)         | 0.358   | 0.05 (-0.02, 0.11)             | 0.152   | -0.07 (-0.2, -0.01) | 0.037   | -0.05 (-0.2, 0.06) | 0.386   | -0.2 (-0.4, -0.1)  | 0.004   |
|                                      | Adjusted <sup>e</sup> (n=412)   | 0.10 (-0.1, 0.3) | 0.370   | 0.05 (-0.1, 0.2)          | 0.523   | 0.0 (-0.1, 0.1)                | 0.968   | -0.02 (-0.1, 0.06)  | 0.630   | -0.01 (-0.1, 0.1)  | 0.913   | -0.1 (-0.3, 0.1)   | 0.276   |
|                                      | Unadjusted <sup>d</sup> (n=514) | 0.15 (-0.4, 0.7) | 0.581   | 0.2 (-0.2, 0.5)           | 0.330   | 0.03 (-0.1, 0.2)               | 0.741   | -0.07 (-0.2, 0.1)   | 0.428   | 0.04 (-0.2, 0.3)   | 0.748   | -0.3 (-0.7, 0.1)   | 0.153   |
|                                      | Adjusted <sup>e</sup> (n=412)   | 0.14 (-0.4, 0.7) | 0.616   | 0.1 (-0.2, 0.5)           | 0.504   | 0.03 (-0.1, 0.2)               | 0.690   | -0.07 (-0.3, 0.1)   | 0.449   | -0.1 (-0.4, 0.2)   | 0.428   | -0.2 (-0.6, 0.3)   | 0.478   |
|                                      | Unadjusted <sup>b</sup> (n=524) | -0.3 (-0.7, 0.2) | 0.224   | 0.1 (-0.2, 0.4)           | 0.585   | -0.01 (0.2, 0.1)               | 0.852   | -0.01 (-0.2, 0.2)   | 0.950   | 0.05 (-0.2, 0.3)   | 0.670   | -0.1 (-0.5, 0.2)   | 0.494   |
|                                      | Adjusted <sup>c</sup> (n=421)   | -0.2 (-0.8, 0.3) | 0.414   | 0.1 (-0.2, 0.5)           | 0.439   | -0.04 (-0.2, 0.1)              | 0.660   | 0.0 (-0.2, 0.2)     | 0.998   | -0.01 (-0.3, 0.3)  | 0.934   | -0.04 (-0.5, 0.4)  | 0.840   |
| Serum leptin 9 years (ng/ml)         |                                 |                  |         |                           |         |                                |         |                     |         |                    |         |                    |         |

<sup>a</sup>Nutrients (% energy) adjusted for total energy according to the multivariate nutrient density model. <sup>b</sup>Adjusted for sex. <sup>c</sup>Adjusted for sex, breast feeding, mothers BMI and fathers' social class. <sup>d</sup>Adjusted for sex and height.

<sup>e</sup>Adjusted for sex, height, breastfeeding, mothers BMI and fathers' social class.

**S3:** Multiple linear regression models for energy and energy-adjusted macronutrient intakes, using diet collected at 18 months of age to predict body composition and serum leptin concentration at the age of 9 years and body composition at 17 years of age in children enrolled in ALSPAC-CiF (replication analysis of Rolland Cachera et al, 1995, 2012 [16, 17])

| Models                               |                                 | Energy (0.42 MJ) |         | Protein (%E) <sup>a</sup> |         | Carbohydrate (%E) <sup>a</sup> |         | Fat (%E)           |         |                   |         |                    |         |
|--------------------------------------|---------------------------------|------------------|---------|---------------------------|---------|--------------------------------|---------|--------------------|---------|-------------------|---------|--------------------|---------|
|                                      |                                 |                  |         |                           |         |                                |         | Total <sup>a</sup> |         | SFA <sup>a</sup>  |         | MUFA <sup>a</sup>  |         |
|                                      |                                 | B (95% CI)       | P-value | B (95% CI)                | P-value | B (95% CI)                     | P-value | B (95% CI)         | P-value | B (95% CI)        | P-value | B (95% CI)         | P-value |
| 9 years<br>BMI (kg/m <sup>2</sup> )  | Unadjusted <sup>b</sup> (n=751) | 0.1 (-0.01, 0.2) | 0.064   | -0.01 (-0.1, 0.1)         | 0.870   | -0.03 (-0.1, 0.01)             | 0.203   | 0.04 (0.0, 0.1)    | 0.105   | 0.03 (-0.03, 0.1) | 0.300   | 0.2 (0.05, 0.3)    | 0.007   |
|                                      | Adjusted <sup>c</sup> (n=607)   | 0.1 (-0.01, 0.2) | 0.033   | 0.03 (-0.1, 0.1)          | 0.550   | -0.03 (-0.1, 0.01)             | 0.207   | 0.03 (-0.02, 0.1)  | 0.221   | 0.03 (-0.03, 0.1) | 0.333   | 0.2 (0.02, 0.3)    | 0.022   |
| FFM (kg)                             | Unadjusted <sup>d</sup> (n=732) | 0.1 (0.01, 0.1)  | 0.024   | 0.0 (-0.1, 0.1)           | 0.953   | 0.01 (-0.01, 0.03)             | 0.286   | -0.02 (-0.04, 0.0) | 0.193   | -0.03 (-0.1, 0.0) | 0.074   | -0.04 (-0.1, 0.03) | 0.244   |
|                                      | Adjusted <sup>e</sup> (n=596)   | 0.05 (0.0, 0.1)  | 0.073   | 0.0 (-0.03, 0.1)          | 0.297   | 0.02 (-0.01, 0.04)             | 0.223   | -0.03 (-0.1, 0.0)  | 0.046   | -0.04 (-0.1, 0.0) | 0.037   | -0.07 (-0.2, 0.0)  | 0.063   |
| FM (kg)                              | Unadjusted <sup>d</sup> (n=732) | 0.0 (-0.1, 0.1)  | 0.827   | -0.0 (-0.2, 0.1)          | 0.618   | -0.08 (-0.1, -0.02)            | 0.006   | 0.1 (0.06, 0.2)    | <0.001  | 0.1 (0.0, 0.2)    | 0.067   | 0.4 (0.2, 0.6)     | <0.001  |
|                                      | Adjusted <sup>e</sup> (n=596)   | 0.0 (-0.1, 0.2)  | 0.617   | 0.0 (-0.2, 0.2)           | 0.964   | -0.08 (-0.1, -0.01)            | 0.02    | 0.1 (0.03, 0.2)    | 0.005   | 0.1 (0.03, 0.2)   | 0.546   | 0.4 (0.2, 0.6)     | 0.001   |
| 17 years<br>BMI (kg/m <sup>2</sup> ) | Unadjusted <sup>b</sup> (n=500) | 0.1 (-0.1, 0.3)  | 0.441   | -0.2 (-0.3, 0.0)          | 0.077   | -0.03 (-0.1, 0.04)             | 0.436   | 0.07 (0.0, 0.2)    | 0.080   | 0.1 (-0.02, 0.2)  | 0.101   | 0.3 (0.0, 0.5)     | 0.032   |
|                                      | Adjusted <sup>c</sup> (n= 405)  | 0.1 (-0.1, 0.3)  | 0.409   | -0.1 (-0.3, 0.1)          | 0.338   | -0.02 (-0.1, 0.05)             | 0.531   | 0.05 (0.0, 0.1)    | 0.239   | 0.1 (-0.05, 0.2)  | 0.295   | 0.3 (0.0, 0.5)     | 0.044   |
| FFM (kg)                             | Unadjusted <sup>d</sup> (n=468) | 0.1 (-0.1, 0.3)  | 0.317   | -0.1 (-0., 0.1)           | 0.239   | 0.06 (-0.0, 0.1)               | 0.061   | -0.1 (-0.2, 0.0)   | 0.089   | -0.1 (-0.2, 0.03) | 0.174   | -0.2 (-0.4, 0.1)   | 0.175   |
|                                      | Adjusted <sup>e</sup> (n=378)   | 0.1 (-0.1, 0.3)  | 0.383   | -0.03 (-0.2, 0.1)         | 0.754   | 0.06 (-0.01, 0.1)              | 0.090   | -0.1 (-0.2, 0.0)   | 0.055   | -0.1 (-0.2, 0.02) | 0.131   | -0.2 (-0.4, 0.1)   | 0.147   |
| FM (kg)                              | Unadjusted <sup>d</sup> (n=468) | 0.1 (-0.3, 0.6)  | 0.569   | -0.2 (-0.6, 0.2)          | 0.376   | -0.1 (-0.3, 0.04)              | 0.135   | 0.2 (0.0, 0.4)     | 0.031   | 0.3 (0.05, 0.5)   | 0.018   | 0.6 (0.1, 1.1)     | 0.022   |
|                                      | Adjusted <sup>e</sup> (n=378)   | 0.2 (-0.3, 0.6)  | 0.417   | -0.05 (-0.5, 0.4)         | 0.802   | -0.1 (-0.3, 0.1)               | 0.232   | 0.2 (-0.1, 0.4)    | 0.136   | 0.2 (-0.02, 0.5)  | 0.069   | 0.6 (0.0, 1.1)     | 0.055   |
| Serum leptin 9 years<br>(ng/ml)      | Unadjusted <sup>b</sup> (n=494) | -0.1 (-0.5, 0.2) | 0.442   | -0.1 (-0.5, 0.2)          | 0.501   | -0.03 (-0.2, 0.1)              | 0.708   | 0.07 (-0.1, 0.3)   | 0.426   | 0.1 (-0.2, 0.3)   | 0.514   | 0.3 (-0.2, 0.7)    | 0.304   |
|                                      | Adjusted <sup>c</sup> (n=403)   | -0.1 (-0.5, 0.3) | 0.677   | -0.02 (-0.4, 0.4)         | 0.918   | -0.09 (-0.3, 0.1)              | 0.299   | 0.1 (-0.1, 0.4)    | 0.190   | 0.16 (-0.1, 0.4)  | 0.249   | 0.4 (-0.2, 0.1)    | 0.151   |

<sup>a</sup>Nutrients (% energy) adjusted for total energy according to the multivariate nutrient density model. <sup>b</sup>Adjusted for sex. <sup>c</sup>Adjusted for sex, breast feeding, mothers BMI and fathers' social class. <sup>d</sup>Adjusted for sex and height. <sup>e</sup>Adjusted for sex, height, breastfeeding, mothers BMI and fathers' social class.

**S4:** Multiple linear regression models for energy and energy-adjusted macronutrient intakes of **boys**, using diet collected at 8 months of age to predict body composition and serum leptin concentration at the age of 9 years and body composition at 17 years of age in children enrolled in ALSPAC-CiF

| Models                   |                                 | Energy (0.42 MJ) |         | Protein (%E) <sup>a</sup> |         | Carbohydrate (%E) <sup>a</sup> |         | Fat (%E)           |         |                  |         |                   |         |
|--------------------------|---------------------------------|------------------|---------|---------------------------|---------|--------------------------------|---------|--------------------|---------|------------------|---------|-------------------|---------|
|                          |                                 |                  |         |                           |         |                                |         | Total <sup>a</sup> |         | SFA <sup>a</sup> |         | MUFA <sup>a</sup> |         |
|                          |                                 | B (95% CI)       | P-value | B (95% CI)                | P-value | B (95% CI)                     | P-value | B (95% CI)         | P-value | B (95% CI)       | P-value | B (95% CI)        | P-value |
| <b>9 years</b>           |                                 |                  |         |                           |         |                                |         |                    |         |                  |         |                   |         |
| BMI (kg/m <sup>2</sup> ) | Unadjusted <sup>a</sup> (n=428) | 0.1 (-0.03, 0.3) | 0.116   | 0.1 (-0.05, 0.2)          | 0.298   | 0.0 (-0.1, 0.04)               | 0.655   | 0.0 (-0.1, 0.1)    | 0.975   | 0.0 (-0.0, 0.1)  | 0.288   | 0.0 (-0.2, 0.1)   | 0.696   |
|                          | Model 1 <sup>b</sup> (n=376)    | 0.1 (-0.02, 0.3) | 0.084   | 0.0 (-0.1, 0.1)           | 0.483   | 0.0 (-0.1, 0.04)               | 0.800   | 0.0 (-0.1, 0.1)    | 0.986   | 0.0 (-0.1, 0.1)  | 0.803   | 0.0 (-0.1, 0.2)   | 0.646   |
|                          | Model 2 <sup>c</sup> (n=299)    | 0.1 (-0.1, 0.3)  | 0.377   | 0.03 (-0.1, 0.1)          | 0.649   | 0.0 (-0.1, 0.05)               | 0.947   | 0.0 (-0.1, 0.1)    | 0.901   | 0.0 (-0.1, 0.1)  | 0.780   | 0.0 (-0.1, 0.2)   | 0.692   |
| FFM (kg)                 | Unadjusted <sup>d</sup> (n=417) | 0.1 (0.04, 0.2)  | 0.005   | 0.04 (0.0, 0.1)           | 0.203   | 0.0 (-0.03, 0.03)              | 0.899   | 0.0 (-0.05, 0.02)  | 0.385   | 0.0 (-0.1, 0.1)  | 0.977   | 0.0 (-0.1, 0.04)  | 0.388   |
|                          | Model 1 <sup>e</sup> (n=367)    | 0.1 (0.01, 0.2)  | 0.036   | 0.02 (0.0, 0.1)           | 0.551   | 0.0 (-0.02, 0.04)              | 0.489   | 0.0 (-0.05, 0.01)  | 0.248   | 0.0 (-0.1, 0.0)  | 0.473   | -0.01 (-0.1, 0.1) | 0.773   |
|                          | Model 2 <sup>f</sup> (n=291)    | 0.1 (-0.04, 0.2) | 0.215   | 0.01 (-0.1, 0.1)          | 0.896   | 0.0 (-0.02, 0.05)              | 0.393   | 0.0 (-0.1, 0.02)   | 0.268   | 0.0 (-0.1, 0.0)  | 0.426   | -0.02 (-0.1, 0.1) | 0.736   |
| FM (kg)                  | Unadjusted <sup>d</sup> (n=417) | 0.06 (-0.2, 0.3) | 0.646   | 0.05 (-0.1, 0.2)          | 0.548   | 0.0 (-0.1, 0.05)               | 0.455   | 0.0 (-0.1, 0.1)    | 0.528   | 0.1 (-0.1, 0.2)  | 0.239   | 0.0 (-0.2, 0.2)   | 0.853   |
|                          | Model 1 <sup>e</sup> (n=367)    | 0.1 (-0.1, 0.4)  | 0.336   | 0.05 (-0.1, 0.2)          | 0.563   | 0.0 (-0.1, 0.1)                | 0.479   | 0.0 (-0.1, 0.1)    | 0.543   | 0.0 (-0.1, 0.2)  | 0.681   | 0.1 (-0.1, 0.3)   | 0.413   |
|                          | Model 2 <sup>f</sup> (n=291)    | 0.1 (-0.2, 0.4)  | 0.586   | 0.1 (-0.1, 0.3)           | 0.441   | 0.0 (-0.1, 0.1)                | 0.739   | 0.0 (-0.1, 0.1)    | 0.967   | 0.0 (-0.1, 0.2)  | 0.834   | 0.0 (-0.2, 0.3)   | 0.867   |
| <b>17 years</b>          |                                 |                  |         |                           |         |                                |         |                    |         |                  |         |                   |         |
| BMI (kg/m <sup>2</sup> ) | Unadjusted <sup>a</sup> (n=257) | 0.0 (-0.3, 0.3)  | 0.981   | 0.03 (-0.2, 0.2)          | 0.768   | 0.0 (-0.1, 0.1)                | 0.850   | 0.0 (-0.1, 0.1)    | 0.675   | 0.0 (-0.2, 0.2)  | 0.828   | 0.0 (-0.3, 0.3)   | 0.999   |
|                          | Model 1 <sup>b</sup> (n=233)    | 0.0 (-0.3, 0.3)  | 0.944   | -0.1 (-0.3, 0.2)          | 0.585   | 0.0 (-0.1, 0.1)                | 0.668   | 0.0 (-0.1, 0.1)    | 0.836   | -0.1 (-0.2, 0.1) | 0.393   | 0.1 (-0.2, 0.4)   | 0.445   |
|                          | Model 2 <sup>c</sup> (n=195)    | -0.1 (-0.4, 0.3) | 0.624   | -0.1 (-0.3, 0.1)          | 0.336   | 0.0 (-0.1, 0.1)                | 0.578   | 0.0 (-0.1, 0.1)    | 0.861   | -0.1 (-0.3, 0.1) | 0.433   | 0.1 (-0.2, 0.4)   | 0.381   |
| FFM (kg)                 | Unadjusted <sup>d</sup> (n=242) | 0.2 (-0.2, 0.5)  | 0.417   | 0.1 (-0.1, 0.3)           | 0.439   | 0.1 (-0.03, 0.2)               | 0.174   | -0.1 (-0.2, 0.02)  | 0.054   | -0.1 (-0.3, 0.1) | 0.202   | -0.3 (-0.6, -0.1) | 0.021   |
|                          | Model 1 <sup>e</sup> (n=218)    | 0.1 (-0.3, 0.5)  | 0.541   | 0.01 (-0.2, 0.3)          | 0.923   | 0.1 (-0.02, 0.2)               | 0.102   | -0.1 (-0.3, 0.0)   | 0.058   | -0.2 (-0.4, 0.0) | 0.070   | -0.3 (-0.6, 0.0)  | 0.089   |
|                          | Model 2 <sup>f</sup> (n=183)    | 0.2 (-0.3, 0.6)  | 0.452   | 0.0 (-0.3, 0.3)           | 0.948   | 0.1 (0.0, 0.2)                 | 0.069   | -0.2 (-0.3, 0.0)   | 0.035   | -0.2 (-0.4, 0.0) | 0.124   | -0.3 (-0.6, 0.0)  | 0.082   |
| FM (kg)                  | Unadjusted <sup>d</sup> (n=242) | 0.03 (-0.8, 0.8) | 0.950   | 0.2 (-0.3, 0.7)           | 0.404   | -0.05 (-0.3, 0.2)              | 0.707   | 0.0 (-0.3, 0.3)    | 0.964   | 0.0 (-0.4, 0.4)  | 0.935   | 0.1 (-0.6, 0.7)   | 0.881   |

|                              |                                 |                   |       |                  |       |                   |       |                   |       |                  |       |                 |       |
|------------------------------|---------------------------------|-------------------|-------|------------------|-------|-------------------|-------|-------------------|-------|------------------|-------|-----------------|-------|
|                              | Model 1 <sup>e</sup> (n=218)    | 0.1 (-0.7, 0.9)   | 0.840 | 0.0 (-0.6, 0.5)  | 0.905 | 0.0 (-0.2, 0.3)   | 0.799 | -0.03 (-0.3, 0.3) | 0.842 | -0.2 (-0.6, 0.3) | 0.461 | 0.2 (-0.5, 0.8) | 0.589 |
|                              | Model 2 <sup>f</sup> (n=183)    | -0.1 (-1.0, 0.8)  | 0.770 | -0.1 (-0.7, 0.5) | 0.681 | 0.1 (-0.2, 0.3)   | 0.671 | -0.04 (-0.3, 0.3) | 0.795 | -0.2 (-0.6, 0.3) | 0.430 | 0.2 (-0.5, 0.9) | 0.583 |
| Serum leptin 9 years (ng/ml) | Unadjusted <sup>a</sup> (n=274) | -0.1 (-0.8, 0.5)  | 0.677 | 0.1 (-0.3, 0.5)  | 0.687 | -0.1 (-0.4, 0.1)  | 0.169 | 0.2 (-0.1, 0.4)   | 0.169 | 0.2 (-0.1, 0.5)  | 0.211 | 0.1 (-0.4, 0.6) | 0.568 |
|                              | Model 1 <sup>b</sup> (n=243)    | -0.05 (-0.7, 0.6) | 0.890 | 0.1 (-0.3, 0.6)  | 0.563 | -0.2 (-0.4, 0.1)  | 0.181 | 0.2 (-0.1, 0.4)   | 0.222 | 0.2 (-0.2, 0.6)  | 0.295 | 0.1 (-0.4, 0.7) | 0.640 |
|                              | Model 2 <sup>c</sup> (n=204)    | 0.1 (-0.5, 0.6)   | 0.828 | 0.2 (-0.2, 0.6)  | 0.310 | -0.1 (-0.3, 0.05) | 0.155 | 0.1 (-0.1, 0.3)   | 0.248 | 0.2 (-0.1, 0.5)  | 0.164 | 0.2 (-0.3, 0.6) | 0.444 |

<sup>a</sup>Nutrients (% energy) adjusted for total energy according to the multivariate nutrient density model. <sup>b</sup>Adjusted for total energy, breastfeeding duration, maternal BMI, maternal education, smoking status, birthweight. <sup>c</sup>Model b + paternal BMI. <sup>d</sup>Model a + height. <sup>e</sup>Model b + height. <sup>f</sup>Model b + height and paternal BMI

**S5:** Multiple linear regression models for energy and energy-adjusted macronutrient intakes of **boys (plausible reporters only)**, using diet collected at 8 months of age to predict body composition and serum leptin concentration at the age of 9 years and body composition at 17 years of age in children enrolled in ALSPAC-CiF

| Models                   |                                 | Energy (0.42 MJ) |         | Protein (%E) <sup>a</sup> |         | Carbohydrate (%E) <sup>a</sup> |         | Fat (%E)           |         |                  |         |                   |       |
|--------------------------|---------------------------------|------------------|---------|---------------------------|---------|--------------------------------|---------|--------------------|---------|------------------|---------|-------------------|-------|
|                          |                                 |                  |         |                           |         |                                |         | Total <sup>a</sup> |         | SFA <sup>a</sup> |         | MUFA <sup>a</sup> |       |
|                          |                                 | B (95% CI)       | P-value | B (95% CI)                | P-value | B (95% CI)                     | P-value | B (95% CI)         | P-value | B (95% CI)       | P-value |                   |       |
| 9 years                  |                                 |                  |         |                           |         |                                |         |                    |         |                  |         |                   |       |
| BMI (kg/m <sup>2</sup> ) | Unadjusted <sup>a</sup> (n=378) | 0.1 (-0.1, 0.3)  | 0.443   | 0.04 (-0.1, 0.2)          | 0.453   | 0.0 (-0.1, 0.0)                | 0.644   | 0.0 (-0.1, 0.1)    | 0.922   | 0.1 (0.0, 0.2)   | 0.219   | -0.1 (-0.2, 0.1)  | 0.327 |
|                          | Model 1 <sup>b</sup> (n=339)    | 0.0 (-0.2, 0.2)  | 0.715   | 0.1 (-0.1, 0.2)           | 0.356   | 0.0 (-0.1, 0.0)                | 0.647   | 0.0 (-0.1, 0.1)    | 0.915   | 0.0 (-0.1, 0.1)  | 0.683   | -0.1 (-0.2, 0.1)  | 0.493 |
|                          | Model 2 <sup>c</sup> (n=270)    | -0.1 (-0.3, 0.1) | 0.396   | 0.0 (-0.1, 0.1)           | 0.610   | 0.0 (-0.1, 0.1)                | 0.955   | 0.0 (-0.1, 0.1)    | 0.780   | 0.0 (-0.1, 0.1)  | 0.901   | 0.0 (-0.2, 0.1)   | 0.802 |
| FFM (kg)                 | Unadjusted <sup>d</sup> (n=366) | 0.0 (-0.2, 0.1)  | 0.515   | 0.0 (-0.1, 0.1)           | 0.928   | 0.0 (-0.1, 0.0)                | 0.298   | 0.0 (-0.02, 0.1)   | 0.284   | 0.1 (0.0, 0.1)   | 0.038   | 0.0 (-0.1, 0.1)   | 0.852 |
|                          | Model 1 <sup>e</sup> (n=330)    | -0.1 (-0.2, 0.0) | 0.191   | 0.0 (-0.1, 0.1)           | 0.996   | 0.0 (-0.1, 0.0)                | 0.267   | 0.0 (-0.02, 0.1)   | 0.305   | 0.04 (0.0, 0.1)  | 0.168   | 0.0 (-0.1, 0.1)   | 0.779 |
|                          | Model 2 <sup>f</sup> (n=264)    | -0.1 (-0.2, 0.0) | 0.120   | 0.0 (-0.1, 0.1)           | 0.783   | 0.0 (-0.1, 0.0)                | 0.475   | 0.0 (-0.02, 0.1)   | 0.418   | 0.0 (0.0, 0.1)   | 0.297   | 0.0 (-0.1, 0.1)   | 0.605 |
| FM (kg)                  | Unadjusted <sup>d</sup> (n=366) | 0.0 (-0.3, 0.3)  | 0.400   | 0.1 (-0.1, 0.3)           | 0.314   | 0.0 (-0.1, 0.1)                | 0.494   | 0.0 (-0.1, 0.1)    | 0.816   | 0.1 (0.0, 0.3)   | 0.160   | -0.1 (-0.3, 0.1)  | 0.415 |
|                          | Model 1 <sup>e</sup> (n=330)    | -0.2 (-0.5, 0.1) | 0.286   | 0.1 (-0.1, 0.3)           | 0.358   | 0.0 (-0.1, 0.1)                | 0.503   | 0.01 (-0.1, 0.1)   | 0.884   | 0.0 (-0.1, 0.2)  | 0.537   | 0.0 (-0.3, 0.2)   | 0.747 |
|                          | Model 2 <sup>f</sup> (n=264)    | -0.2 (-0.5, 0.1) | 0.260   | 0.1 (-0.1, 0.3)           | 0.338   | 0.0 (-0.1, 0.1)                | 0.898   | -0.02 (-0.1, 0.1)  | 0.662   | 0.0 (-0.2, 0.1)  | 0.779   | 0.0 (-0.3, 0.2)   | 0.738 |
| 17 years                 |                                 |                  |         |                           |         |                                |         |                    |         |                  |         |                   |       |
| BMI (kg/m <sup>2</sup> ) | Unadjusted <sup>a</sup> (n=289) | 0.1 (-0.2, 0.4)  | 0.644   | 0.1 (-0.1, 0.3)           | 0.400   | 0.0 (-0.1, 0.1)                | 0.673   | -0.05 (-0.1, 0.1)  | 0.390   | 0.0 (-0.1, 0.2)  | 0.643   | -0.2 (-0.5, 0.0)  | 0.045 |
|                          | Model 1 <sup>b</sup> (n=256)    | -0.1 (-0.4, 0.3) | 0.729   | 0.1 (-0.1, 0.3)           | 0.513   | 0.0 (-0.1, 0.1)                | 0.538   | -0.05 (-0.1, 0.1)  | 0.300   | 0.0 (-0.2, 0.1)  | 0.606   | -0.2 (-0.4, 0.0)  | 0.071 |
|                          | Model 2 <sup>c</sup> (n=205)    | -0.1 (-0.5, 0.2) | 0.481   | 0.0 (-0.2, 0.2)           | 0.940   | 0.0 (-0.1, 0.1)                | 0.562   | -0.03 (-0.1, 0.1)  | 0.519   | 0.0 (-0.2, 0.1)  | 0.830   | -0.1 (-0.4, 0.1)  | 0.384 |
| FFM (kg)                 | Unadjusted <sup>d</sup> (n=272) | 0.0 (-0.2, 0.3)  | 0.961   | 0.0 (-0.1, 0.2)           | 0.740   | 0.0 (-0.1, 0.1)                | 0.500   | 0.0 (-0.1, 0.04)   | 0.341   | 0.0 (-0.1, 0.1)  | 0.854   | -0.2 (-0.4, 0.0)  | 0.089 |
|                          | Model 1 <sup>e</sup> (n=240)    | -0.1 (-0.4, 0.2) | 0.553   | 0.1 (-0.1, 0.2)           | 0.598   | 0.0 (-0.1, 0.1)                | 0.475   | -0.1 (-0.1, 0.03)  | 0.254   | 0.0 (-0.2, 0.1)  | 0.698   | -0.2 (-0.4, 0.0)  | 0.086 |
|                          | Model 2 <sup>f</sup> (n=192)    | -0.2 (-0.5, 0.1) | 0.140   | -0.1 (-0.3, 0.1)          | 0.351   | 0.0 (-0.0, 0.1)                | 0.269   | -0.04 (-0.1, 0.1)  | 0.407   | 0.0 (-0.2, 0.1)  | 0.600   | -0.1 (-0.3, 0.1)  | 0.427 |
| FM (kg)                  | Unadjusted <sup>d</sup> (n=272) | 0.2 (-0.5, 0.9)  | 0.498   | 0.1 (-0.4, 0.6)           | 0.679   | 0.1 (-0.1, 0.3)                | 0.382   | -0.1 (-0.3, 0.1)   | 0.289   | 0.1 (-0.3, 0.4)  | 0.763   | -0.6 (-1.1, 0.0)  | 0.036 |

|                              |                                 |                  |       |                  |       |                 |       |                  |       |                  |       |                  |       |
|------------------------------|---------------------------------|------------------|-------|------------------|-------|-----------------|-------|------------------|-------|------------------|-------|------------------|-------|
|                              | Model 1 <sup>e</sup> (n=240)    | -0.1 (-0.8, 0.6) | 0.852 | 0.1 (-0.3, 0.6)  | 0.603 | 0.1 (-0.1, 0.3) | 0.405 | -0.1 (-0.3, 0.1) | 0.270 | -0.1 (-0.4, 0.3) | 0.685 | -0.5 (-1.0, 0.0) | 0.056 |
|                              | Model 2 <sup>f</sup> (n=192)    | -0.1 (-0.9, 0.7) | 0.786 | -0.1 (-0.6, 0.4) | 0.721 | 0.1 (-0.1, 0.3) | 0.403 | -0.1 (-0.3, 0.2) | 0.473 | -0.1 (-0.4, 0.3) | 0.779 | -0.2 (-0.8, 0.3) | 0.412 |
| Serum leptin 9 years (ng/ml) | Unadjusted <sup>a</sup> (n=250) | -0.5 (-1.1, 0.2) | 0.177 | 0.1 (-0.4, 0.5)  | 0.736 | 0.1 (-0.1, 0.3) | 0.272 | -0.2 (-0.4, 0.1) | 0.146 | -0.1 (-0.5, 0.2) | 0.517 | -0.4 (-0.9, 0.1) | 0.120 |
|                              | Model 1 <sup>b</sup> (n=225)    | -0.7 (-1.5, 0.1) | 0.068 | 0.1 (-0.4, 0.5)  | 0.741 | 0.1 (-0.1, 0.3) | 0.328 | -0.2 (-0.4, 0.1) | 0.163 | -0.2 (-0.6, 0.2) | 0.309 | -0.4 (-0.9, 0.2) | 0.191 |
|                              | Model 2 <sup>c</sup> (n=181)    | -0.7 (-1.6, 0.1) | 0.101 | 0.0 (-0.5, 0.5)  | 0.989 | 0.2 (-0.1, 0.4) | 0.139 | -0.2 (-0.5, 0.0) | 0.081 | -0.3 (-0.7, 0.0) | 0.080 | -0.4 (-0.9, 0.2) | 0.217 |

<sup>a</sup>Nutrients (% energy) adjusted for total energy according to the multivariate nutrient density model. <sup>b</sup>Adjusted for total energy, breastfeeding duration, maternal BMI, maternal education, smoking status, birthweight. <sup>c</sup>Model b + paternal BMI. <sup>d</sup>Model a + height. <sup>e</sup>Model b + height.

<sup>f</sup>Model b + height and paternal BMI



**S6:** Multiple linear regression models for energy and energy-adjusted macronutrient intakes of **girls**, using diet collected at 8 months of age to predict body composition and serum leptin concentration at the age of 9 years and body composition at 17 years of age in children enrolled in ALSPAC-CiF

| Models                   |                                 | Energy (0.42 MJ) |         | Protein (%E) <sup>a</sup> |         | Carbohydrate (%E) <sup>a</sup> |         | Fat (%E)           |         |                  |         |                   |       |
|--------------------------|---------------------------------|------------------|---------|---------------------------|---------|--------------------------------|---------|--------------------|---------|------------------|---------|-------------------|-------|
|                          |                                 |                  |         |                           |         |                                |         | Total <sup>a</sup> |         | SFA <sup>a</sup> |         | MUFA <sup>a</sup> |       |
|                          |                                 | B (95% CI)       | P-value | B (95% CI)                | P-value | B (95% CI)                     | P-value | B (95% CI)         | P-value | B (95% CI)       | P-value |                   |       |
| 9 years                  |                                 |                  |         |                           |         |                                |         |                    |         |                  |         |                   |       |
| BMI (kg/m <sup>2</sup> ) | Unadjusted <sup>a</sup> (n=319) | 0.3 (0.0, 0.6)   | 0.047   | 0.1 (-0.1, 0.2)           | 0.259   | 0.0 (-0.1, 0.0)                | 0.555   | 0.0 (-0.1, 0.1)    | 0.892   | 0.1 (0.0, 0.2)   | 0.165   | -0.1 (-0.3, 0.04) | 0.158 |
|                          | Model 1 <sup>b</sup> (n=285)    | 0.2 (-0.1, 0.5)  | 0.217   | 0.1 (-0.03, 0.2)          | 0.141   | 0.0 (-0.1, 0.0)                | 0.452   | 0.0 (-0.1, 0.1)    | 0.978   | 0.1 (-0.1, 0.1)  | 0.330   | -0.1 (-0.2, 0.1)  | 0.212 |
|                          | Model 2 <sup>c</sup> (n=231)    | 0.0 (-0.3, 0.3)  | 0.854   | 0.1 (-0.1, 0.2)           | 0.328   | -0.02 (-0.1, 0.0)              | 0.527   | 0.0 (-0.1, 0.1)    | 0.885   | 0.0 (-0.1, 0.1)  | 0.664   | -0.03 (-0.2, 0.1) | 0.690 |
| FFM (kg)                 | Unadjusted <sup>d</sup> (n=308) | 0.0 (-0.2, 0.2)  | 0.962   | 0.0 (-0.1, 0.1)           | 0.642   | -0.02 (-0.1, 0.0)              | 0.196   | 0.0 (-0.02, 0.1)   | 0.256   | 0.1 (0.0, 0.1)   | 0.025   | -0.02 (-0.1, 0.1) | 0.641 |
|                          | Model 1 <sup>e</sup> (n=276)    | 0.0 (-0.2, 0.1)  | 0.672   | 0.0 (-0.1, 0.1)           | 0.578   | -0.03 (-0.1, 0.0)              | 0.172   | 0.0 (-0.02, 0.06)  | 0.255   | 0.1 (0.0, 0.1)   | 0.085   | 0.0 (-0.1, 0.1)   | 0.960 |
|                          | Model 2 <sup>f</sup> (n=225)    | -0.1 (-0.4, 0.1) | 0.169   | 0.0 (-0.1, 0.1)           | 0.744   | -0.02 (-0.1, 0.0)              | 0.261   | 0.02 (-0.02, 0.1)  | 0.313   | 0.1 (0.0, 0.1)   | 0.165   | 0.0 (-0.1, 0.1)   | 0.668 |
| FM (kg)                  | Unadjusted <sup>d</sup> (n=308) | 0.1 (-0.3, 0.6)  | 0.615   | 0.1 (-0.04, 0.3)          | 0.134   | -0.04 (-0.1, 0.1)              | 0.408   | 0.0 (-0.1, 0.1)    | 0.831   | 0.1 (0.0, 0.3)   | 0.108   | -0.2 (-0.4, 0.1)  | 0.174 |
|                          | Model 1 <sup>e</sup> (n=276)    | 0.0 (-0.4, 0.5)  | 0.942   | 0.1 (-0.04, 0.3)          | 0.126   | -0.04 (-0.1, 0.1)              | 0.359   | 0.0 (-0.1, 0.1)    | 0.857   | 0.1 (-0.1, 0.2)  | 0.258   | -0.1 (-0.4, 0.1)  | 0.335 |
|                          | Model 2 <sup>f</sup> (n=225)    | -0.1 (-0.6, 0.4) | 0.596   | 0.1 (-0.1, 0.3)           | 0.144   | -0.03 (-0.1, 0.1)              | 0.548   | -0.01 (-0.1, 0.1)  | 0.859   | 0.0 (-0.2, 0.2)  | 0.885   | -0.1 (-0.3, 0.2)  | 0.579 |
| 17 years                 |                                 |                  |         |                           |         |                                |         |                    |         |                  |         |                   |       |
| BMI (kg/m <sup>2</sup> ) | Unadjusted <sup>a</sup> (n=244) | 0.4 (-0.1, 0.9)  | 0.150   | 0.1 (-0.2, 0.3)           | 0.696   | 0.0 (-0.1, 0.1)                | 0.560   | -0.1 (-0.2, 0.1)   | 0.432   | 0.0 (-0.2, 0.2)  | 0.865   | -0.2 (-0.5, 0.1)  | 0.109 |
|                          | Model 1 <sup>b</sup> (n=215)    | 0.3 (-0.2, 0.8)  | 0.193   | 0.0 (-0.2, 0.2)           | 0.941   | 0.04 (-0.1, 0.1)               | 0.411   | -0.1 (-0.2, 0.1)   | 0.352   | -0.1 (-0.2, 0.1) | 0.596   | -0.2 (-0.5, 0.1)  | 0.128 |
|                          | Model 2 <sup>c</sup> (n=176)    | 0.1 (-0.5, 0.6)  | 0.805   | 0.0 (-0.3, 0.2)           | 0.865   | 0.04 (-0.1, 0.1)               | 0.486   | -0.04 (-0.2, 0.1)  | 0.467   | 0.0 (-0.2, 0.2)  | 0.781   | -0.1 (-0.4, 0.2)  | 0.347 |
| FFM (kg)                 | Unadjusted <sup>d</sup> (n=228) | 0.2 (-0.2, 0.7)  | 0.254   | 0.0 (-0.2, 0.2)           | 0.970   | 0.04 (-0.04, 0.1)              | 0.329   | -0.1 (-0.1, 0.0)   | 0.283   | 0.0 (-0.2, 0.1)  | 0.776   | -0.2 (-0.4, 0.1)  | 0.124 |
|                          | Model 1 <sup>e</sup> (n=199)    | 0.1 (-0.3, 0.6)  | 0.559   | 0.0 (-0.2, 0.2)           | 0.896   | 0.04 (-0.1, 0.1)               | 0.394   | -0.1 (-0.1, 0.1)   | 0.309   | 0.0 (-0.2, 0.1)  | 0.657   | -0.2 (-0.4, 0.1)  | 0.125 |
|                          | Model 2 <sup>f</sup> (n=163)    | -0.1 (-0.7, 0.4) | 0.595   | -0.1 (-0.4, 0.1)          | 0.250   | 0.1 (-0.04, 0.2)               | 0.259   | -0.04 (-0.2, 0.1)  | 0.480   | -0.1 (-0.2, 0.1) | 0.583   | -0.1 (-0.3, 0.2)  | 0.535 |
| FM (kg)                  | Unadjusted <sup>d</sup> (n=228) | 1.0 (-0.1, 2.2)  | 0.074   | 0.0 (-0.6, 0.5)           | 0.920   | 0.1 (-0.1, 0.3)                | 0.343   | -0.1 (-0.4, 0.1)   | 0.369   | 0.1 (-0.4, 0.5)  | 0.806   | -0.5 (-1.1, 0.1)  | 0.088 |

|                              |                                 |                  |       |                  |       |                 |       |                  |       |                  |       |                  |       |
|------------------------------|---------------------------------|------------------|-------|------------------|-------|-----------------|-------|------------------|-------|------------------|-------|------------------|-------|
|                              | Model 1 <sup>a</sup> (n=199)    | 0.9 (-0.2, 1.9)  | 0.110 | 0.0 (-0.5, 0.5)  | 0.986 | 0.1 (-0.1, 0.3) | 0.390 | -0.1 (-0.3, 0.1) | 0.387 | 0.0 (-0.4, 0.4)  | 0.952 | -0.5 (-1.0, 0.1) | 0.092 |
|                              | Model 2 <sup>f</sup> (n=163)    | 0.5 (-0.8, 1.7)  | 0.466 | -0.1 (-0.7, 0.4) | 0.680 | 0.1 (-0.1, 0.4) | 0.350 | -0.1 (-0.4, 0.2) | 0.411 | 0.0 (-0.5, 0.4)  | 0.879 | -0.4 (-1.0, 0.3) | 0.261 |
| Serum leptin 9 years (ng/ml) | Unadjusted <sup>a</sup> (n=212) | -0.1 (-1.2, 1.0) | 0.866 | 0.0 (-0.5, 0.4)  | 0.920 | 0.1 (-0.1, 0.3) | 0.312 | -0.1 (-0.4, 0.1) | 0.296 | 0.0 (-0.4, 0.4)  | 0.831 | -0.5 (-1.0, 0.1) | 0.115 |
|                              | Model 1 <sup>b</sup> (n=190)    | -0.2 (-1.4, 0.9) | 0.702 | 0.0 (-0.4, 0.5)  | 0.899 | 0.1 (-0.1, 0.3) | 0.419 | -0.1 (-0.4, 0.1) | 0.307 | -0.1 (-0.5, 0.3) | 0.664 | -0.5 (-1.1, 0.2) | 0.150 |
|                              | Model 2 <sup>c</sup> (n=158)    | -0.4 (-1.7, 0.9) | 0.540 | 0.1 (-0.4, 0.6)  | 0.747 | 0.2 (-1.0, 0.4) | 0.232 | -0.2 (-0.5, 0.1) | 0.114 | -0.3 (-0.7, 0.1) | 0.162 | -0.5 (-1.1, 0.2) | 0.151 |

<sup>a</sup>Nutrients (% energy) adjusted for total energy according to the multivariate nutrient density model. <sup>b</sup>Adjusted for total energy, breastfeeding duration, maternal BMI, maternal education, smoking status, birthweight. <sup>c</sup>Model b + paternal BMI. <sup>d</sup>Model a + height. <sup>e</sup>Model b + height. <sup>f</sup>Model b + height and paternal BMI

**S7:** Multiple linear regression models for energy and energy-adjusted macronutrient intakes of **girls (plausible reporters only)**, using diet collected at 8 months of age to predict body composition and serum leptin concentration at the age of 9 years and body composition at 17 years of age in children enrolled in ALSPAC-CiF

| Models                   |                                 | Energy (0.42 MJ) |         | Protein (%E) <sup>a</sup> |         | Carbohydrate (%E) <sup>a</sup> |         | Fat (%E)           |         |                  |         |                   |         |
|--------------------------|---------------------------------|------------------|---------|---------------------------|---------|--------------------------------|---------|--------------------|---------|------------------|---------|-------------------|---------|
|                          |                                 |                  |         |                           |         |                                |         | Total <sup>a</sup> |         | SFA <sup>a</sup> |         | MUFA <sup>a</sup> |         |
|                          |                                 | B (95% CI)       | P-value | B (95% CI)                | P-value | B (95% CI)                     | P-value | B (95% CI)         | P-value | B (95% CI)       | P-value | B (95% CI)        | P-value |
| <b>9 years</b>           |                                 |                  |         |                           |         |                                |         |                    |         |                  |         |                   |         |
| BMI (kg/m <sup>2</sup> ) | Unadjusted <sup>a</sup> (n=353) | 0.2 (-0.01, 0.5) | 0.065   | 0.04 (-0.1, 0.2)          | 0.461   | 0.0 (-0.1, 0.02)               | 0.225   | 0.04 (0.0, 0.1)    | 0.274   | 0.1 (0.0, 0.2)   | 0.066   | 0.03 (-0.1, 0.2)  | 0.662   |
|                          | Model 1 <sup>b</sup> (n=313)    | 0.2 (-0.1, 0.4)  | 0.148   | 0.02 (-0.1, 0.1)          | 0.781   | 0.0 (-0.1, 0.03)               | 0.403   | 0.0 (-0.03, 0.1)   | 0.379   | 0.0 (-0.1, 0.1)  | 0.392   | 0.1 (-0.1, 0.3)   | 0.196   |
|                          | Model 2 <sup>c</sup> (n=250)    | 0.1 (-0.2, 0.3)  | 0.530   | 0.0 (-0.1, 0.1)           | 0.994   | 0.0 (-0.1, 0.04)               | 0.581   | 0.0 (-0.1, 0.1)    | 0.503   | 0.0 (-0.1, 0.1)  | 0.552   | 0.1 (-0.1, 0.3)   | 0.233   |
| FFM (kg)                 | Unadjusted <sup>d</sup> (n=343) | 0.2 (0.1, 0.3)   | 0.005   | 0.03 (0.0, 0.1)           | 0.432   | 0.0 (-0.04, 0.02)              | 0.548   | 0.0 (-0.03, 0.04)  | 0.830   | 0.0 (0.0, 0.1)   | 0.422   | 0.0 (-0.1, 0.1)   | 0.860   |
|                          | Model 1 <sup>e</sup> (n=304)    | 0.1 (0.0, 0.3)   | 0.064   | 0.0 (-0.1, 0.1)           | 0.816   | 0.0 (-0.03, 0.03)              | 0.978   | 0.0 (-0.04, 0.03)  | 0.815   | 0.0 (-0.1, 0.1)  | 0.979   | 0.03 (-0.1, 0.1)  | 0.522   |
|                          | Model 2 <sup>f</sup> (n=242)    | 0.1 (0.0, 0.3)   | 0.128   | 0.0 (-0.1, 0.1)           | 0.803   | 0.0 (-0.03, 0.04)              | 0.800   | 0.0 (-0.1, 0.04)   | 0.790   | 0.0 (-0.1, 0.1)  | 0.903   | 0.03 (-0.1, 0.1)  | 0.593   |
| FM (kg)                  | Unadjusted <sup>d</sup> (n=343) | 0.0 (-0.4, 0.4)  | 0.929   | 0.1 (-0.1, 0.3)           | 0.412   | -0.1 (-0.1, 0.04)              | 0.263   | 0.1 (-0.1, 0.2)    | 0.337   | 0.1 (-0.0, 0.3)  | 0.116   | 0.03 (-0.2, 0.3)  | 0.821   |
|                          | Model 1 <sup>e</sup> (n=304)    | 0.0 (-0.3, 0.5)  | 0.884   | 0.04 (-0.1, 0.2)          | 0.651   | -0.1 (-0.1, 0.04)              | 0.307   | 0.1 (-0.1, 0.2)    | 0.298   | 0.1 (-0.1, 0.2)  | 0.464   | 0.2 (-0.1, 0.4)   | 0.217   |
|                          | Model 2 <sup>f</sup> (n=242)    | 0.0 (-0.5, 0.4)  | 0.873   | 0.1 (-0.2, 0.3)           | 0.591   | -0.03 (-0.1, 0.1)              | 0.541   | 0.03 (-0.1, 0.1)   | 0.637   | 0.0 (-0.1, 0.2)  | 0.719   | 0.1 (-0.2, 0.4)   | 0.556   |
| <b>17 years</b>          |                                 |                  |         |                           |         |                                |         |                    |         |                  |         |                   |         |
| BMI (kg/m <sup>2</sup> ) | Unadjusted <sup>a</sup> (n=212) | -0.1 (-0.6, 0.4) | 0.705   | 0.0 (-0.2, 0.3)           | 0.895   | -0.03 (-0.2, 0.1)              | 0.688   | 0.03 (-0.1, 0.2)   | 0.718   | 0.1 (-0.2, 0.3)  | 0.634   | 0.1 (-0.2, 0.4)   | 0.503   |

|                              |                                 |                  |       |                  |       |                   |       |                   |       |                   |       |                  |       |
|------------------------------|---------------------------------|------------------|-------|------------------|-------|-------------------|-------|-------------------|-------|-------------------|-------|------------------|-------|
| FFM (kg)                     | Model 1 <sup>b</sup> (n=193)    | -0.2 (-0.7, 0.3) | 0.385 | -0.1 (-0.3, 0.2) | 0.451 | 0.0 (-0.1, 0.1)   | 0.981 | 0.03 (-0.1, 0.2)  | 0.708 | -0.03 (-0.2, 0.2) | 0.748 | 0.3 (-0.1, 0.6)  | 0.125 |
|                              | Model 2 <sup>c</sup> (n=162)    | -0.2 (-0.8, 0.3) | 0.387 | -0.2 (-0.4, 0.1) | 0.275 | 0.02 (-0.1, 0.2)  | 0.737 | 0.01 (-0.1, 0.2)  | 0.882 | -0.1 (-0.3, 0.2)  | 0.588 | 0.3 (-0.1, 0.6)  | 0.143 |
|                              | Unadjusted <sup>d</sup> (n=200) | 0.1 (-0.4, 0.6)  | 0.700 | 0.0 (-0.3, 0.3)  | 0.962 | 0.05 (-0.1, 0.2)  | 0.476 | -0.1 (-0.2, 0.1)  | 0.456 | -0.1 (-0.3, 0.2)  | 0.614 | -0.2 (-0.6, 0.1) | 0.222 |
|                              | Model 1 <sup>e</sup> (n=181)    | 0.0 (-0.5, 0.6)  | 0.967 | 0.0 (0.3, 0.2)   | 0.796 | 0.1 (-0.1, 0.2)   | 0.351 | -0.1 (-0.2, 0.1)  | 0.357 | -0.1 (-0.3, 0.1)  | 0.354 | -0.2 (-0.5, 0.2) | 0.440 |
|                              | Model 2 <sup>f</sup> (n=152)    | 0.3 (-0.3, 0.9)  | 0.344 | 0.0 (-0.3, 0.3)  | 0.902 | 0.1 (-0.05, 0.2)  | 0.181 | -0.1 (-0.3, 0.03) | 0.114 | -0.1 (-0.4, 0.1)  | 0.304 | -0.3 (-0.7, 0.2) | 0.207 |
|                              |                                 |                  |       |                  |       |                   |       |                   |       |                   |       |                  |       |
| FM (kg)                      | Unadjusted <sup>d</sup> (n=200) | -0.1 (-1.3, 1.1) | 0.918 | 0.3 (-0.3, 0.9)  | 0.350 | -0.1 (-0.4, 0.2)  | 0.391 | 0.1 (-0.3, 0.4)   | 0.635 | 0.2 (-0.3, 0.7)   | 0.514 | 0.2 (-0.6, 1.0)  | 0.595 |
|                              | Model 1 <sup>e</sup> (n=181)    | -0.1 (-1.3, 1.1) | 0.905 | 0.0 (-0.6, 0.6)  | 0.940 | -0.01 (-0.3, 0.3) | 0.951 | 0.02 (-0.3, 0.4)  | 0.894 | -0.1 (-0.6, 0.4)  | 0.723 | 0.4 (-0.4, 1.2)  | 0.350 |
|                              | Model 2 <sup>f</sup> (n=152)    | -0.1 (-1.4, 1.3) | 0.897 | -0.1 (-0.8, 0.6) | 0.726 | 0.03 (-0.3, 0.3)  | 0.874 | 0.0 (-0.4, 0.4)   | 0.995 | -0.1 (-0.7, 0.4)  | 0.606 | 0.4 (-0.5, 1.3)  | 0.351 |
|                              |                                 |                  |       |                  |       |                   |       |                   |       |                   |       |                  |       |
| Serum leptin 9 years (ng/ml) | Unadjusted <sup>a</sup> (n=223) | 0.0 (-1.1, 1.0)  | 0.950 | 0.0 (-0.5, 0.5)  | 0.996 | -0.2 (-0.4, 0.1)  | 0.212 | 0.2 (-0.1, 0.5)   | 0.125 | 0.2 (-0.2, 0.6)   | 0.256 | 0.2 (-0.4, 0.8)  | 0.541 |
|                              | Model 1 <sup>b</sup> (n=198)    | 0.0 (-1.1, 1.2)  | 0.942 | 0.0 (-0.5, 0.6)  | 0.906 | -0.2 (-0.4, 0.1)  | 0.206 | 0.2 (-0.1, 0.5)   | 0.146 | 0.2 (-0.2, 0.7)   | 0.305 | 0.2 (-0.5, 1.0)  | 0.549 |
|                              | Model 2 <sup>c</sup> (n=168)    | 0.1 (-0.8, 1.0)  | 0.798 | 0.1 (-0.3, 0.6)  | 0.502 | -0.1 (-0.3, 0.1)  | 0.222 | 0.1 (-0.1, 0.4)   | 0.230 | 0.2 (-0.2, 0.5)   | 0.282 | 0.1 (-0.4, 0.7)  | 0.668 |

<sup>a</sup>Nutrients (% energy) adjusted for total energy according to the multivariate nutrient density model. <sup>b</sup>Adjusted for total energy, breastfeeding duration, maternal BMI, maternal education, smoking status, birthweight. <sup>c</sup>Model b + paternal BMI. <sup>d</sup>Model a + height. <sup>e</sup>Model b + height. <sup>f</sup>Model b + height and paternal BMI

**S8:** Goodness of fit for multiple linear regression models for energy and energy-adjusted macronutrient intakes of **boys**, using diet collected at 18 months of age to predict body composition and serum leptin concentration at 9 years of age and body composition at 17 years of age in children enrolled in ALSPAC-CiF (Table 2)

| Model                  |                                 | Energy/0.42 MJ          |                    | Protein (%E)            |                    | Carbohydrate (%E)       |                    | Fat (%E)                |                    |                         |                    |                         |                    |
|------------------------|---------------------------------|-------------------------|--------------------|-------------------------|--------------------|-------------------------|--------------------|-------------------------|--------------------|-------------------------|--------------------|-------------------------|--------------------|
|                        |                                 |                         |                    |                         |                    |                         |                    | Total                   |                    | SFA                     |                    | MUFA                    |                    |
|                        |                                 | Adjusted R <sup>2</sup> | SE of the estimate | Adjusted R <sup>2</sup> | SE of the estimate | Adjusted R <sup>2</sup> | SE of the estimate | Adjusted R <sup>2</sup> | SE of the estimate | Adjusted R <sup>2</sup> | SE of the estimate | Adjusted R <sup>2</sup> | SE of the estimate |
| <b>9 years</b>         |                                 |                         |                    |                         |                    |                         |                    |                         |                    |                         |                    |                         |                    |
| BMI, kg/m <sup>2</sup> | Model 1 <sup>b</sup><br>(n=360) | 0.152                   | 2.601              | 0.150                   | 2.604              | 0.160                   | 2.589              | 0.162                   | 2.584              | 0.157                   | 2.592              | 0.168                   | 2.576              |
|                        | Model 2 <sup>c</sup><br>(n=289) | 0.159                   | 2.613              | 0.156                   | 2.616              | 0.165                   | 2.602              | 0.168                   | 2.598              | 0.163                   | 2.605              | 0.173                   | 2.591              |
| FFM, kg                | Model 1 <sup>d</sup><br>(n=352) | 0.723                   | 1.565              | 0.723                   | 1.566              | 0.724                   | 1.561              | 0.726                   | 1.557              | 0.725                   | 1.559              | 0.727                   | 1.553              |
|                        | Model 2 <sup>e</sup><br>(n=283) | 0.724                   | 1.552              | 0.724                   | 1.554              | 0.726                   | 1.547              | 0.728                   | 1.541              | 0.728                   | 1.541              | 0.730                   | 1.537              |
| FM, kg                 | Model 1 <sup>d</sup><br>(n=352) | 0.341                   | 4.116              | 0.339                   | 4.122              | 0.354                   | 4.074              | 0.361                   | 4.050              | 0.354                   | 4.074              | 0.362                   | 4.048              |
|                        | Model 2 <sup>e</sup><br>(n=283) | 0.354                   | 4.186              | 0.351                   | 4.194              | 0.363                   | 4.156              | 0.368                   | 4.139              | 0.363                   | 4.155              | 0.366                   | 4.145              |
| <b>17 years</b>        |                                 |                         |                    |                         |                    |                         |                    |                         |                    |                         |                    |                         |                    |
| BMI, kg/m <sup>2</sup> | Model 1 <sup>b</sup><br>(n=220) | 0.139                   | 4.107              | 0.143                   | 4.097              | 0.136                   | 4.116              | 0.139                   | 4.107              | 0.139                   | 4.107              | 0.147                   | 4.089              |
|                        | Model 2 <sup>c</sup><br>(n=185) | 0.152                   | 4.084              | 0.158                   | 4.069              | 0.149                   | 4.091              | 0.156                   | 4.075              | 0.150                   | 4.090              | 0.168                   | 4.047              |
| FFM, kg                | Model 1 <sup>d</sup><br>(n=205) | 0.348                   | 4.512              | 0.346                   | 4.517              | 0.349                   | 4.508              | 0.354                   | 4.489              | 0.345                   | 4.519              | 0.359                   | 4.472              |
|                        | Model 2 <sup>e</sup><br>(n=172) | 0.388                   | 4.458              | 0.385                   | 4.469              | 0.393                   | 4.440              | 0.399                   | 4.416              | 0.388                   | 4.456              | 0.402                   | 4.404              |
| FM, kg                 | Model 1 <sup>d</sup><br>(n=205) | 0.123                   | 9.763              | 0.121                   | 9.773              | 0.125                   | 9.753              | 0.131                   | 9.717              | 0.136                   | 9.687              | 0.137                   | 9.684              |
|                        | Model 2 <sup>e</sup><br>(n=172) | 0.138                   | 9.687              | 0.135                   | 9.706              | 0.145                   | 9.645              | 0.154                   | 9.596              | 0.151                   | 9.616              | 0.161                   | 9.560              |

|                        |                                 |       |       |        |       |       |       |       |       |       |       |       |       |
|------------------------|---------------------------------|-------|-------|--------|-------|-------|-------|-------|-------|-------|-------|-------|-------|
| 9y Serum leptin, ng/ml | Model 1 <sup>b</sup><br>(n=243) | 0.004 | 9.042 | -0.006 | 8.904 | 0.007 | 9.029 | 0.013 | 9.000 | 0.007 | 9.027 | 0.010 | 9.016 |
|                        | Model 2 <sup>c</sup><br>(n=204) | 0.096 | 6.532 | 0.001  | 9.057 | 0.112 | 6.475 | 0.121 | 6.440 | 0.123 | 6.435 | 0.124 | 6.432 |

---

Prediction interval = 100 – (2 x SEE)%

<sup>a</sup>Nutrients (% energy) adjusted for total energy according to the multivariate nutrient density model. <sup>b</sup>Adjusted for total energy, breastfeeding duration, maternal BMI, maternal education, smoking status, birthweight. <sup>c</sup>Model as shown in footnote b + paternal BMI. <sup>d</sup>Model shown in footnote b + height. <sup>e</sup>Model shown in footnote b + height and paternal BMI

**S9:** Goodness of fit for multiple linear regression models for energy and energy-adjusted macronutrient intakes of **girls** using diet collected at 18 months of age to predict body composition and serum leptin concentration at 9 years of age and body composition at 17 years of age in children enrolled in ALSPAC-CiF (Table 4)

| Model                  |                                 | Energy/0.42 MJ                             |       | Protein (%E) <sup>a</sup>                  |       | Carbohydrate (%E) <sup>a</sup>             |       | Fat (%E)                |                    |                         |                    |                         |                    |
|------------------------|---------------------------------|--------------------------------------------|-------|--------------------------------------------|-------|--------------------------------------------|-------|-------------------------|--------------------|-------------------------|--------------------|-------------------------|--------------------|
|                        |                                 | Adjusted R <sup>2</sup> SE of the estimate |       | Adjusted R <sup>2</sup> SE of the estimate |       | Adjusted R <sup>2</sup> SE of the estimate |       | Total <sup>a</sup>      |                    | SFA <sup>a</sup>        |                    | MUFA <sup>a</sup>       |                    |
|                        |                                 |                                            |       |                                            |       |                                            |       | Adjusted R <sup>2</sup> | SE of the estimate | Adjusted R <sup>2</sup> | SE of the estimate | Adjusted R <sup>2</sup> | SE of the estimate |
| 9 years                |                                 |                                            |       |                                            |       |                                            |       |                         |                    |                         |                    |                         |                    |
| BMI, kg/m <sup>2</sup> | Model 1 <sup>b</sup><br>(n=360) | 0.104                                      | 2.759 | 0.101                                      | 2.763 | 0.104                                      | 2.760 | 0.104                   | 2.760              | 0.102                   | 2.762              | 0.101                   | 2.764              |
|                        | Model 2 <sup>c</sup><br>(n=289) | 0.155                                      | 2.511 | 0.156                                      | 2.510 | 0.156                                      | 2.509 | 0.154                   | 2.512              | 0.155                   | 2.511              | 0.153                   | 2.514              |
| FFM, kg                | Model 1 <sup>d</sup><br>(n=352) | 0.711                                      | 1.628 | 0.710                                      | 1.631 | 0.711                                      | 1.630 | 0.711                   | 1.628              | 0.712                   | 1.627              | 0.710                   | 1.631              |
|                        | Model 2 <sup>e</sup><br>(n=283) | 0.708                                      | 1.616 | 0.707                                      | 1.619 | 0.708                                      | 1.616 | 0.708                   | 1.616              | 0.709                   | 1.614              | 0.707                   | 1.619              |
| FM, kg                 | Model 1 <sup>d</sup><br>(n=352) | 0.215                                      | 4.291 | 0.213                                      | 4.296 | 0.212                                      | 4.298 | 0.212                   | 4.298              | 0.213                   | 4.296              | 0.216                   | 4.287              |
|                        | Model 2 <sup>e</sup><br>(n=283) | 0.264                                      | 3.854 | 0.262                                      | 3.859 | 0.262                                      | 3.860 | 0.264                   | 3.856              | 0.262                   | 3.860              | 0.276                   | 3.823              |
| 17 years               |                                 |                                            |       |                                            |       |                                            |       |                         |                    |                         |                    |                         |                    |
| BMI, kg/m <sup>2</sup> | Model 1 <sup>b</sup><br>(n=220) | 0.197                                      | 3.949 | 0.194                                      | 3.956 | 0.193                                      | 3.958 | 0.194                   | 3.957              | 0.194                   | 3.957              | 0.195                   | 3.955              |
|                        | Model 2 <sup>c</sup><br>(n=185) | 0.267                                      | 3.805 | 0.268                                      | 3.803 | 0.263                                      | 3.815 | 0.262                   | 3.816              | 0.263                   | 3.815              | 0.268                   | 3.801              |
| FFM, kg                | Model 1 <sup>d</sup><br>(n=205) | 0.437                                      | 3.244 | 0.440                                      | 3.233 | 0.443                                      | 3.225 | 0.439                   | 3.236              | 0.445                   | 3.221              | 0.435                   | 3.248              |
|                        | Model 2 <sup>e</sup><br>(n=172) | 0.465                                      | 3.241 | 0.474                                      | 3.216 | 0.480                                      | 3.196 | 0.473                   | 3.216              | 0.482                   | 3.189              | 0.463                   | 3.247              |
| FM, kg                 | Model 1 <sup>d</sup><br>(n=205) | 0.203                                      | 8.360 | 0.199                                      | 8.378 | 0.199                                      | 8.380 | 0.199                   | 8.379              | 0.200                   | 8.375              | 0.199                   | 8.379              |
|                        | Model 2 <sup>e</sup><br>(n=172) | 0.252                                      | 8.072 | 0.251                                      | 8.074 | 0.247                                      | 8.095 | 0.247                   | 8.095              | 0.247                   | 8.096              | 0.252                   | 8.070              |

|                              |                                 |       |       |       |       |       |       |       |       |       |       |       |       |
|------------------------------|---------------------------------|-------|-------|-------|-------|-------|-------|-------|-------|-------|-------|-------|-------|
| 9y Serum<br>leptin,<br>ng/ml | Model 1 <sup>b</sup><br>(n=243) | 0.034 | 8.929 | 0.029 | 8.953 | 0.033 | 8.935 | 0.035 | 8.926 | 0.033 | 8.934 | 0.030 | 8.951 |
|                              | Model 2 <sup>c</sup><br>(n=204) | 0.036 | 8.297 | 0.040 | 8.279 | 0.052 | 8.225 | 0.048 | 8.245 | 0.051 | 8.229 | 0.030 | 8.320 |

---

Prediction interval = 100 – (2 x SEE)%

<sup>a</sup>Nutrients (% energy) adjusted for total energy according to the multivariate nutrient density model. <sup>b</sup>Adjusted for total energy, breastfeeding duration, maternal BMI, maternal education, smoking status, birthweight. <sup>c</sup>Model as shown in footnote b + paternal BMI. <sup>d</sup>Model shown in footnote b + height. <sup>e</sup>Model shown in footnote b + height and paternal BMI
